# Supplementary material
Source: publisher figshare collection journal article supplement (https://tandf.figshare.com/ndownloader/files/19431977)
Supplement: Supplementary file 1 [file 19431977]

**Electrochemical synthesis of hydroxy-thioxo-imidazole carboxylate: An experimental and theoretical study**

Najoua Sbeia b *, Ridha Ben Said c d, Seyfeddine Rahali c, Haouas Beya* b, Abdullah S. Al-Ayed c, Muneerah Mogren Al Mogrene , Mohamed Lamin Benkhoud b and Mahamadou Seydou f *

a *Peoples' Friendship University of Russia, 6 Miklukho-Maklaya St., Moscow 117198*

b Laboratoire de Chimie Analytique et d'Electrochimie, Université Tunis El Manar 2092 El-Manar Tunis, Tunisia

c Department of Chemistry, College of Science & Arts at Al-Rass, Qassim University, P.O. 53, Saudi Arabia

d Laboratoire de Caractérisations, Applications et Modélisations des Matériaux, Faculté des Sciences de Tunis, Université Tunis El Manar, 2092, Tunis, Tunisie

e Chemistry Department, Faculty of Science, King Saud University, PO Box 2455, Riyadh 11451, Saudi Arabia

f Université Paris Sorbonne Paris Cité, ITODYS, UMR CNRS 7086, 15 rue J-A de Baïf, 75013, Paris, France

E-mail: [najwasbei89@hotmail.fr](mailto:najwasbei89@hotmail.fr) (N. Sbei), mahamadou.seydou@univ-paris-diderot.fr (M. Seydou). [Haouas.beya@yahoo.fr](mailto:Haouas.beya@yahoo.fr) (H.Beya)

Supplementary Information

1. Selected spectral data……………………………………………………………………………………………..….2

2. Correlation between calculated and experimental 1H and 13C NMR chemical shifts…………...………..…….4

**3. xyz coordinates of all intermediates I and C…….………………………………………………………………….5**

**4. xyz coordinates of transition states TSIC and assisted TSIC-ass……………………………………………..……..8**

**1 .Selected spectral data**


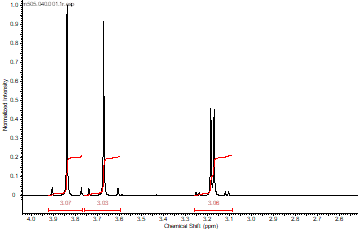

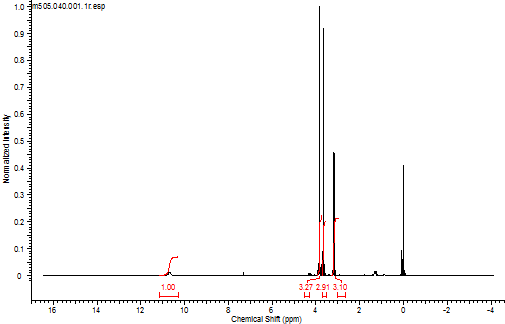


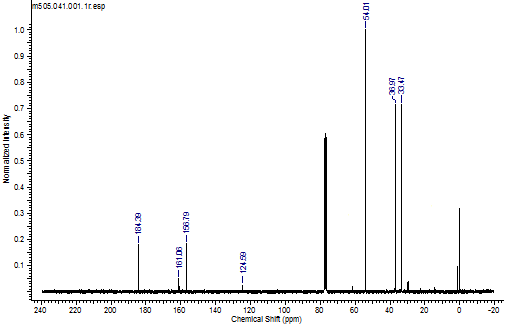


**Fig. S1:** 1H, 13C and COSY NMR spectra of methyl5-hydroxy-1,3-dimethyl-2-thioxo-2,3-dihydro-1H-imidazole-4-carboxylate (d1)

**2. Correlation between calculated and experimental 1H and 13**C NMR chemical shifts

| **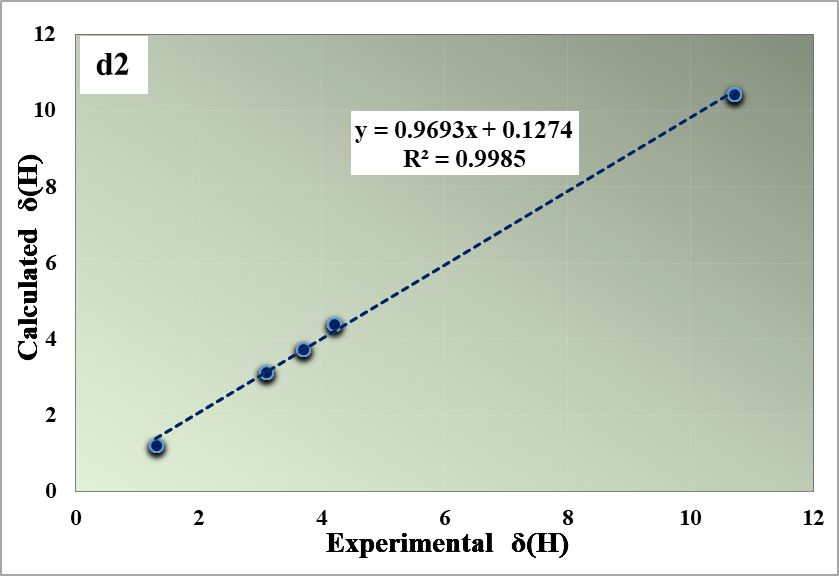** | **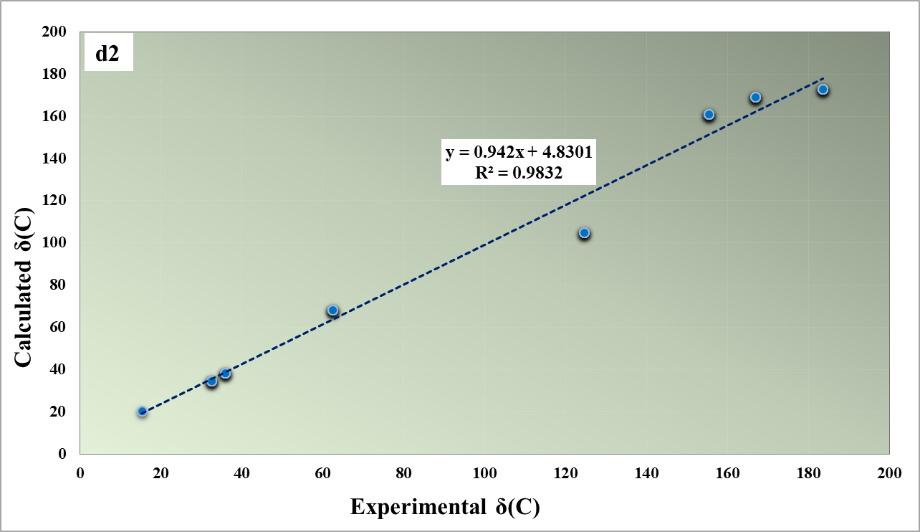** |
| --- | --- |
| **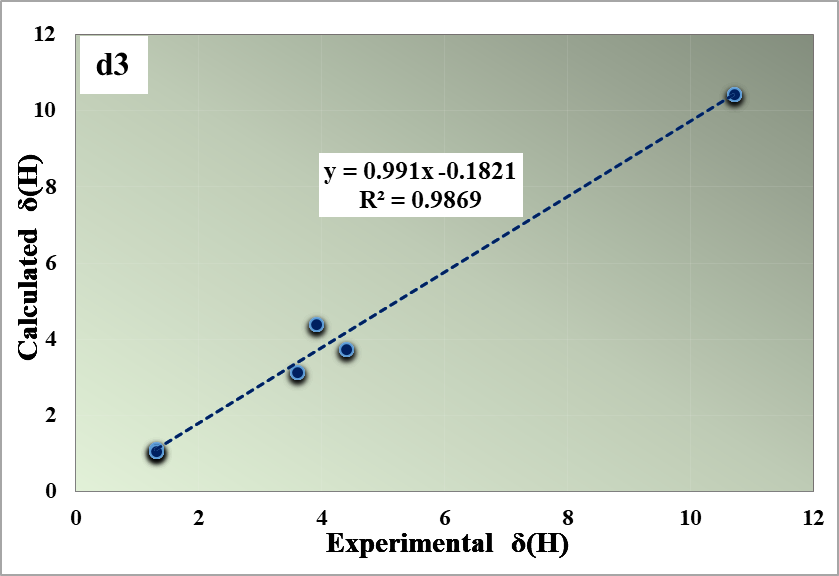** | **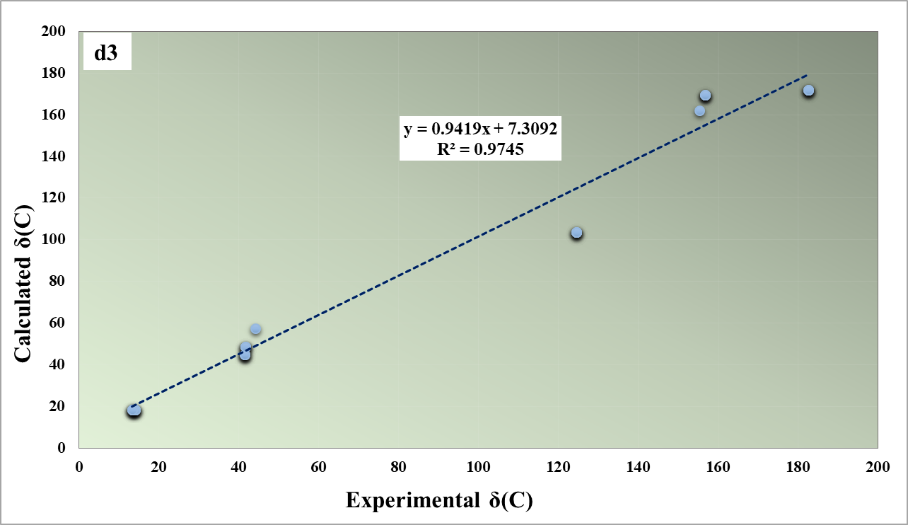** |
| **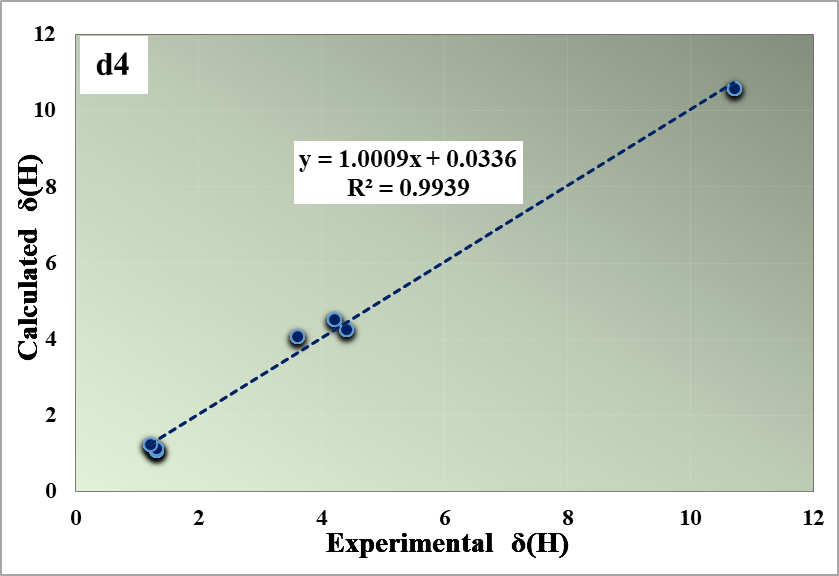** | **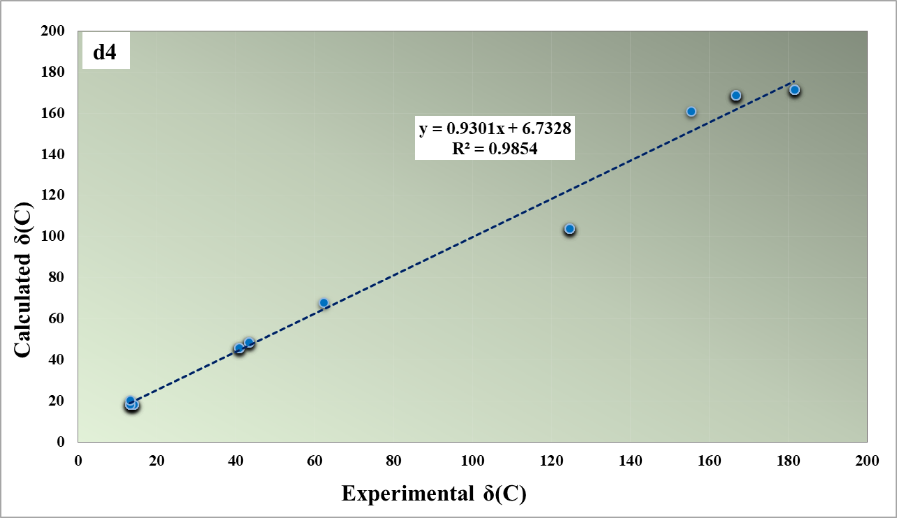** |

**Figure S2:** Correlation plot of calculated versus experimental 1H and 13C NMR chemical shifts of d2, d3 and d4 (DFT/B3LYP/aug-cc-PVDZ level).

**3. xyz coordinates of all intermediates I and C**

All the optimizations of geometry were performed by Gaussian09 D.01 package **[1]**.

| **I 1**  C,0,0.849089934,1.374678715,0.2154347758  N,0,1.0531153902,0.7734241023,1.4194142024  N,0,-0.2876617105,1.1528022896,-0.4786798493  S,0,2.125635165,2.3910203836,-0.3794881527  C,0,-1.147537503,0.0173070097,-0.2407590556  O,0,0.543881588,-1.2178339868,-1.27429211  O,0,-1.2474572534,-2.373317905,-0.4942590187  H,0,1.955724868,1.0116521607,1.8055090543  C,0,0.0633712445,0.3128085601,2.3958523786  H,0,-0.8232345537,0.9577195458,2.3995300866  H,0,-0.2479762133,-0.7232340215,2.2186144988  H,0,0.5402434011,0.3710138866,3.3816547683  C,0,-0.6930498624,-1.2783619947,-0.6452658788  C,0,-2.4372485146,0.3351577933,0.2868509926  O,0,-2.8011182627,1.476421352,0.6181172589  O,0,-3.3029809668,-0.7239460612,0.4065352286  C,0,-4.6063119899,-0.4061325593,0.911328413  H,0,-5.1347706582,0.2914436404,0.2471159597  H,0,-5.1449837964,-1.3597017003,0.9474687345  H,0,-4.5543562544,0.0274736004,1.918990809  C,0,-0.5618308129,1.9072044506,-1.7048637653  H,0,-0.0550453165,1.4516314875,-2.5692632159  H,0,-1.6431632509,1.8876729854,-1.8718928791  H,0,-0.2275497823,2.9441618198,-1.6090943136  C,0,1.0824147108,-2.4714377013,-1.7066064924  H,0,1.2405709748,-3.1547715461,-0.8613071486  H,0,0.4275109039,-2.9584295515,-2.4420530189  H,0,2.0450655216,-2.2328507549,-2.172662262  **I 2**  C,0,0.8490899327,1.3746787168,0.2154347748  N,0,1.0531153903,0.7734241045,1.4194142014  N,0,-0.2876617118,1.15280229,-0.4786798497  S,0,2.1256351619,2.3910203873,-0.3794881544  C,0,-1.1475375031,0.0173070093,-0.2407590552  O,0,0.5438815891,-1.2178339862,-1.2742921089  O,0,-1.2474572519,-2.3733179055,-0.4942590183  H,0,1.9557248678,1.0116521647,1.8055090531  C,0,0.0633712458,0.3128085607,2.3958523781  H,0,-0.8232345531,0.9577195454,2.3995300871  H,0,-0.247976211,-0.723234021,2.2186144981  H,0,0.5402434031,0.3710138875,3.3816547675  C,0,-0.6930498615,-1.2783619948,-0.6452658784  C,0,-2.437248515,0.335157792,0.2868509927  O,0,-2.8011182642,1.4764213507,0.618117258  O,0,-3.3029809661,-0.7239460632,0.4065352299  C,0,-4.6063119893,-0.4061325621,0.9113284145  H,0,-5.1347706586,0.2914436366,0.2471159609  H,0,-5.1449837949,-1.3597017036,0.9474687368  H,0,-4.5543562539,0.0274735984,1.9189908102  C,0,-0.5618308153,1.9072044503,-1.704863766  H,0,-0.0550453186,1.4516314874,-2.5692632165  H,0,-1.6431632534,1.8876729839,-1.8718928793  H,0,-0.2275497857,2.9441618199,-1.6090943146  C,0,1.0824147122,-2.4714377003,-1.7066064922  H,0,1.2405709773,-3.1547715452,-0.8613071488  H,0,0.4275109048,-2.9584295505,-2.4420530184  H,0,2.0450655225,-2.2328507532,-2.1726622625  **I 3**  C,0,-1.6409748844,-1.3432379271,0.4005548634  N,0,-1.2265280919,-1.4099697578,1.6941007931  N,0,-0.9601442953,-0.623177311,-0.5162257205  S,0,-3.0748508675,-2.2595719225,0.0155865921  C,0,0.3850218094,-0.1392666521,-0.3035467549  O,0,-0.6310451749,1.9507083762,-0.0928778101  O,0,1.6367217003,1.90015685,-0.0133247781  H,0,-1.8200834267,-2.0230462079,2.2371055915  C,0,-0.4210855158,-0.4713366556,2.4926762412  H,0,0.6487446781,-0.6468241,2.3285345336  H,0,-0.6441911336,0.5569226036,2.1858245102  C,0,0.5810826523,1.267209514,-0.1303638145  C,0,1.4101522701,-1.1398726458,-0.307127787  O,0,1.220721551,-2.3586856372,-0.4432477008  O,0,2.6867510508,-0.6617736141,-0.1252421574  C,0,3.7238567948,-1.6501714531,-0.1220242249  H,0,3.7730324293,-2.1846889919,-1.0804738018  H,0,4.6553749276,-1.0956490613,0.0385556549  H,0,3.584038974,-2.3790437277,0.6877075105  C,0,-1.501091301,-0.4142180022,-1.8743637569  H,0,-2.5868602336,-0.5343757375,-1.8305924762  H,0,-1.2810501747,0.6281491001,-2.1328927432  C,0,-0.5374427545,3.3758507163,0.0062900893  H,0,-0.0455533513,3.6842128798,0.9384618564  H,0,0.011126576,3.8015224479,-0.8448350073  H,0,-1.5709907101,3.739981786,-0.0025689081  C,0,-0.9079163646,-1.3441620005,-2.9308200122  H,0,-1.14242776,-2.3948357633,-2.7185155715  H,0,-1.3329654268,-1.0876865914,-3.9125710016  H,0,0.1825757315,-1.2336067304,-2.9949871924  C,0,-0.7561980478,-0.6593925425,3.9693238371  H,0,-0.5514368391,-1.6904311253,4.2930673203  H,0,-0.1381776291,0.0152229811,4.5767724665  H,0,-1.8129258224,-0.4333782169,4.1719867695  **I4**  C,0,-1.8215706214,-0.6546226363,0.3560123505  N,0,-1.5395720933,-0.6210546725,1.6875680223  N,0,-0.8474679435,-0.4751156081,-0.5633799286  S,0,-3.4937529381,-0.8988207485,-0.0666050401  C,0,0.4321550054,0.1150594837,-0.2333500354  O,0,-0.7524718525,2.1283779141,-0.2778042807  O,0,1.4503419274,2.2411360625,0.2605613221  H,0,-2.3789250682,-0.7348376417,2.2405534219  C,0,-0.2930225944,-0.9558518565,2.3977057507  H,0,0.2555700634,-1.7121101986,1.8257362911  H,0,0.3484431904,-0.0703830157,2.4864228045  C,0,0.4834814711,1.5361821709,-0.0549000502  C,0,1.5499500201,-0.7764501651,-0.2157863362  O,0,1.4752543637,-2.0098940339,-0.3573728731  O,0,2.7724756016,-0.181999141,-0.0240340421  C,0,3.9155733331,-1.0595558053,-0.0313891764  H,0,3.9624015295,-1.5931050981,-0.9910836924  H,0,3.8103326825,-1.8097424306,0.7645335952  C,0,-1.1515815722,-0.6339923174,-2.0044653866  H,0,-2.1370665781,-0.1989880216,-2.2037116082  H,0,-0.3999939295,-0.0385960096,-2.532656986  C,0,-0.8096586422,3.5584821955,-0.129076321  H,0,-0.4982387642,3.8366296323,0.8874088966  H,0,-0.10981259,4.028575248,-0.8346013151  C,0,-1.1083689974,-2.0802156496,-2.4979451043  H,0,-1.8465269976,-2.6988694206,-1.9713071703  H,0,-1.349114851,-2.1044857233,-3.5714653817  H,0,-0.1128024632,-2.5145948482,-2.3500163486  C,0,-0.6357696854,-1.4894003142,3.7857988275  H,0,-1.2289083486,-2.4129152169,3.7234423992  H,0,0.2892589379,-1.7114229722,4.3347675132  H,0,-1.2042726476,-0.748174688,4.3669130554  C,0,-2.2358266017,3.9973718937,-0.4037272012  H,0,-2.9363185184,3.5479991475,0.3140094262  H,0,-2.3046767507,5.090866928,-0.311662261  H,0,-2.5479324226,3.7184432627,-1.4200257209  C,0,5.1523631568,-0.2065733896,0.1811432127  H,0,6.0442475932,-0.8495632766,0.1748622504  H,0,5.2623223779,0.5402567439,-0.6177191258  H,0,5.1138152176,0.3170624567,1.1467779962 | **C1**  C,0,0.7618369401,1.4172277688,0.3373437265  N,0,0.7041418908,0.4460803752,1.3047643347  N,0,-0.4391128203,1.4340147794,-0.2788434822  S,0,2.1335607314,2.4047763328,0.0162665374  C,0,-1.3058130468,0.4575295058,0.2984143639  O,0,-0.8336331651,-1.1074448524,2.1379834576  C,0,1.7898256063,0.0812819171,2.1931866896  H,0,2.6486121781,-0.3011835478,1.6264104137  H,0,2.1153746643,0.9438694532,2.7877513472  H,0,1.4114325821,-0.7020261554,2.8568826685  C,0,-0.5689795762,-0.1918384324,1.3334801005  C,0,-2.6300033854,0.2070154217,-0.1798389648  O,0,-3.1843929326,0.7610172174,-1.1380961612  O,0,-3.2780219999,-0.7557844045,0.5488811747  C,0,-4.6025785787,-1.0850245886,0.1044650012  H,0,-4.5937231675,-1.4717325897,-0.9233885293  H,0,-4.9532849033,-1.8633838676,0.7906176319  H,0,-5.2691658477,-0.2140179853,0.1585911818  C,0,-0.7955584034,2.3681745107,-1.3367592755  H,0,0.0680011507,3.0151562002,-1.5089294567  H,0,-1.0474839567,1.8299690369,-2.2569754296  H,0,-1.6590429604,2.9723279043,-1.0351743299  **C2**  C,0,0.8303384201,1.430049845,0.2941256671  N,0,0.790447291,0.4722161612,1.2751810122  N,0,-0.3752356081,1.4254551312,-0.3128053004  S,0,2.1894128736,2.428070862,-0.0509758724  C,0,-1.226674555,0.4458138524,0.2827220111  O,0,-0.7227256745,-1.0858325594,2.1430978918  C,0,1.8765638886,0.1543662048,2.1806238564  H,0,2.7631020822,-0.1803234963,1.627292058  H,0,2.1488259642,1.0281497645,2.7864226648  H,0,1.5251366397,-0.6502920264,2.8334879529  C,0,-0.4741013604,-0.1824904117,1.3196245326  C,0,-2.5797186951,0.2305305658,-0.1302559815  O,0,-3.178717751,0.8477609269,-1.0207470209  O,0,-3.186493798,-0.7762064791,0.5749591424  C,0,-4.5847209834,-1.017834018,0.2986138852  H,0,-4.7772502237,-0.8722313735,-0.7703507102  H,0,-4.7317228512,-2.076285149,0.5464975246  C,0,-0.7283062499,2.3011642909,-1.4207197098  H,0,0.1534047462,2.9008876137,-1.6593003948  H,0,-1.0256612995,1.7098299207,-2.2935800796  H,0,-1.5597271097,2.9582500665,-1.1413771692  C,0,-5.4879285873,-0.1364985343,1.1467878037  H,0,-5.3431950684,0.9258712385,0.9100360365  H,0,-6.5393096577,-0.3933039842,0.9484884137  H,0,-5.2933601625,-0.2907384522,2.2175487258  **C3**  C,0,-1.9038788188,0.1051590519,-1.3644352246  N,0,-1.786034395,1.122753174,-0.4496177796  N,0,-0.688884532,-0.066166313,-1.9281967249  S,0,-3.3455542617,-0.773906126,-1.7034486378  C,0,0.2475401836,0.8639715049,-1.3790943809  O,0,-0.1362877808,2.5634232452,0.3604584402  C,0,-2.8537589925,1.6457332186,0.3947714869  H,0,-3.5379579695,0.818544658,0.6103158955  H,0,-2.3800117736,1.9668097954,1.3292112663  C,0,-0.4611845166,1.6384784747,-0.4110672964  C,0,1.6240541111,0.9281156139,-1.7595074993  O,0,2.2001140303,0.2112321634,-2.5894810483  O,0,2.3056255259,1.9117733143,-1.0905614498  C,0,3.6951358465,2.0424916407,-1.425202533  H,0,3.8277511632,2.2945354577,-2.4858651661  H,0,4.0677281288,2.8611231368,-0.8003221801  C,0,-0.4222659725,-1.0462697294,-2.9852516214  H,0,0.5812994957,-1.4436658972,-2.8209926966  H,0,-1.1552805634,-1.847486348,-2.8506685043  C,0,-0.5361838799,-0.4547212697,-4.389448203  H,0,-1.5457516957,-0.0621830962,-4.5715698052  H,0,0.1916941425,0.3529123539,-4.5391785693  H,0,-0.3349320223,-1.239278711,-5.1332676203  C,0,-3.6056287142,2.8143101856,-0.2427148819  H,0,-4.3735758808,3.182484782,0.4527538867  H,0,-2.9239132427,3.6448891492,-0.4699219983  H,0,-4.1041283256,2.5052665623,-1.1711552739  H,0,4.2485469699,1.1212483882,-1.1998810306  **C4**  C,0,-1.9591177177,0.0842739564,-1.414876991  N,0,-1.82275838,1.071020168,-0.4694423688  N,0,-0.7389212176,-0.118749799,-1.9564933113  S,0,-3.4260453167,-0.7319777252,-1.8021783136  C,0,0.2213413441,0.7558708537,-1.3584409307  O,0,-0.1381964468,2.4166673771,0.4246811607  C,0,-2.8816446968,1.5950625709,0.3852430676  H,0,-3.5998080957,0.7854037668,0.5502138232  H,0,-2.40989031,1.8512075003,1.3406848357  C,0,-0.4791372753,1.5311330626,-0.3852529478  C,0,1.6154792738,0.7474517484,-1.6809826492  O,0,2.1811193087,-0.0001688255,-2.4907456533  O,0,2.3137274217,1.6998528967,-0.984404512  C,0,3.7446257972,1.7417371919,-1.1841860435  H,0,3.9733812354,1.5418934003,-2.2373078851  H,0,4.0175381388,2.7786214879,-0.951929331  C,0,-0.4911572272,-1.0456703711,-3.0646987699  H,0,0.4710312353,-1.5288821447,-2.8830554468  H,0,-1.2866791845,-1.7952760156,-3.0195147011  C,0,4.47948183,0.7757511609,-0.2677774533  H,0,4.2282892792,-0.2670619917,-0.5015669608  H,0,5.5643313213,0.9054822658,-0.3974911384  H,0,4.2360479523,0.9714767081,0.7860834758  C,0,-0.4888906012,-0.3536514411,-4.4269207153  H,0,-1.4635521611,0.106381431,-4.6404525832  H,0,0.2869139172,0.4210099917,-4.4743473371  H,0,-0.280938085,-1.0945096528,-5.2124842068  C,0,-3.579439026,2.8224239942,-0.2017464527  H,0,-4.3434218902,3.1838896995,0.5015730979  H,0,-2.8640745149,3.6370922766,-0.3772798035  H,0,-4.0758256083,2.580716578,-1.1511301946 |
| --- | --- |

**4. xyz coordinates of transition states TSIC , assisted TSIC-ass**

| **TSIC (d1)**  C,0,1.7266261826,-0.5845685683,-0.0981981907  N,0,1.4195634427,0.7484717715,-0.5873861021  N,0,0.5750330051,-1.18587826,0.2011809341  S,0,3.3093581309,-1.1595654726,0.0931895359  C,0,0.5783280424,-2.5044381911,0.8332450043  H,0,-0.4536344397,-2.8635025749,0.8715804716  H,0,1.2052882638,-3.1898818179,0.2457885584  H,0,1.0086198565,-2.4279116562,1.8450706915  C,0,-0.607982683,-0.4195752921,-0.0268876516  O,0,0.3655821839,1.7467932979,1.2661384072  O,0,-0.7800308275,1.7945200606,-1.0656976698  H,0,1.6230923512,1.4459558279,0.1739462408  C,0,1.940963795,1.1375100216,-1.9046810532  H,0,3.034342548,1.2252964382,-1.8662266782  H,0,1.652778789,0.3888930968,-2.6554872442  H,0,1.4881842358,2.1051712512,-2.1593344515  C,0,-0.4216488756,2.8191188627,1.6325752888  H,0,0.1759480334,3.6604211952,2.057765395  H,0,-0.9842270068,3.2464643211,0.7670069412  H,0,-1.18698574,2.5661821563,2.4107847464  C,0,-0.2372978743,0.9366639218,-0.3934303924  C,0,-1.9160762105,-0.9661824811,-0.0099144119  O,0,-2.2570966709,-2.1504427659,0.1580614346  O,0,-2.8798969493,0.0067970236,-0.1947926  C,0,-4.2215892349,-0.4719834247,-0.2486847004  H,0,-4.8493395421,0.4166076467,-0.4064426972  H,0,-4.375291797,-1.1810149058,-1.0798433434  H,0,-4.5193150088,-0.9717014827,0.6882555369  **TSIC (d2)**  C,0,-2.1284465761,-0.702349469,-0.0854036977  N,0,-1.8865207762,0.4058364352,0.8212226335  N,0,-0.9459160552,-1.1898803778,-0.4612671554  S,0,-3.6804710341,-1.168204193,-0.5816672853  C,0,-0.8726733498,-2.234430114,-1.4813679934  H,0,0.1502239736,-2.6199708166,-1.4985180962  H,0,-1.1516223379,-1.8133318891,-2.4614184557  C,0,0.2021413541,-0.5443375092,0.09138249  O,0,-0.7142484821,1.9229297451,-0.5583989502  O,0,0.2535538189,1.2510307455,1.7618032742  H,0,-2.0511263047,1.3067303446,0.3054478795  C,0,-2.5092761737,0.3525325792,2.1507047891  H,0,-3.5961456057,0.4800769577,2.0637284705  H,0,-2.074896809,1.1680800918,2.744775163  C,0,0.0541092952,3.0740747139,-0.5073147906  H,0,-0.5688296308,3.9685054173,-0.7495308984  H,0,0.4421579543,3.2512941504,0.5257652651  C,0,-0.2174644332,0.6409715838,0.819885457  C,0,1.5040988055,-1.1043605692,0.0569255993  O,0,1.8497297127,-2.2135526742,-0.3889106299  O,0,2.4467011365,-0.2426090314,0.5913331113  C,0,3.7868684831,-0.7502936394,0.6988805976  H,0,4.228870378,-0.1941028893,1.5405968108  H,0,3.7603641634,-1.8200547713,0.9561864422  C,0,1.2477552224,3.0391846221,-1.4712055401  H,0,0.9077219332,2.8459758107,-2.5043221234  H,0,1.8085130447,3.992506208,-1.4652199869  H,0,1.9461739059,2.2314722109,-1.1917819834  C,0,4.5950345269,-0.5279137485,-0.5702785635  H,0,5.6345810188,-0.8662073727,-0.418295206  H,0,4.1664324853,-1.0959983706,-1.4103033227  H,0,4.6214909749,0.540288414,-0.8429809509  H,0,-1.5855116354,-3.0331464807,-1.2356120097  H,0,-2.2839109835,-0.6109411143,2.6285696562  **TSIC (d3)**  C,0,1.6162448449,0.2198437068,-0.2766391416  N,0,1.2287771114,-1.0966522425,0.2018927228  N,0,0.5051866237,0.9450073828,-0.4238712151  S,0,3.2276940838,0.6200932384,-0.6354715457  C,0,0.5626821996,2.296032494,-1.010688242  H,0,-0.3887705633,2.4607324293,-1.525519593  H,0,1.3871786329,2.2838431304,-1.7370950122  C,0,-0.7138878404,0.2957263476,-0.0642850634  O,0,-0.168938113,-1.8960269713,-1.5154263999  O,0,-0.9998523783,-1.9272129808,0.9316446957  H,0,1.2548263289,-1.7650787313,-0.609852825  C,0,1.8862024572,-1.6466586121,1.4107425972  H,0,2.9472839435,-1.8034529199,1.1682997515  H,0,1.4140552956,-2.6273226036,1.5676624234  C,0,-1.0993046243,-2.8757744664,-1.804832492  H,0,-0.6402240762,-3.7591631389,-2.3079109265  H,0,-1.5970217509,-3.2648926956,-0.884253186  H,0,-1.9178665314,-2.5267696388,-2.4844710303  C,0,-0.4533382,-1.1082312701,0.2125415901  C,0,-1.9472483458,0.9794761893,0.065251959  O,0,-2.1668172523,2.1957295917,-0.0696714279  O,0,-2.9876780472,0.1191541346,0.3657863399  C,0,-4.2620280615,0.7413579288,0.5098435088  H,0,-4.9651902334,-0.0692648817,0.7491011402  H,0,-4.2693556359,1.4863658529,1.3232089896  H,0,-4.5819235546,1.2444213362,-0.4182213759  C,0,0.7900550459,3.3852626718,0.0323779671  H,0,1.7390455853,3.2348562917,0.5703166164  H,0,0.8363942325,4.3654367903,-0.4711288563  H,0,-0.0420054713,3.4083674039,0.7507661821  C,0,1.7191250989,-0.7665261584,2.6397887951  H,0,2.2067966437,-1.2522444546,3.5001323299  H,0,2.1876561398,0.220557881,2.5026637644  H,0,0.6559754124,-0.6243490353,2.8868729594  **TSIC (d4)**  C,0,-1.9947683798,-0.1995473676,-0.3590660276  N,0,-1.6489686173,0.9517051488,0.4554597165  N,0,-0.8756894549,-0.8903293173,-0.5892178264  S,0,-3.5684782627,-0.4664134239,-0.9400604037  C,0,-0.8847771196,-2.0531141668,-1.4956325228  H,0,0.1126054411,-2.1182207167,-1.9410009619  H,0,-1.6287596966,-1.8340788051,-2.2742806678  C,0,0.3117461617,-0.3755484829,0.0135622987  O,0,-0.0942681701,2.1307638315,-0.8798917923  O,0,0.5162810805,1.5186515533,1.5572020851  H,0,-1.5971525036,1.7970071904,-0.168223291  C,0,-2.4034833819,1.2099136403,1.7038045403  H,0,-3.43612554,1.4652354108,1.4243069254  H,0,-1.9293555899,2.1012373464,2.1401974882  C,0,0.8177661515,3.1736852817,-0.8042954968  H,0,0.3526697035,4.1216333857,-1.1648442173  H,0,1.1116182475,3.3658248812,0.2558703657  C,0,0.036560999,0.9226653512,0.609153436  C,0,1.5133064102,-1.1180697549,0.1068596303  O,0,1.7112506298,-2.2944478646,-0.2459082716  O,0,2.5415455949,-0.3676605316,0.6542198994  C,0,3.7637644832,-1.0710180251,0.9305328753  H,0,4.2292714929,-0.5059902277,1.7535273636  H,0,3.5347708952,-2.0878799864,1.2850953586  C,0,2.0894843271,2.9137693073,-1.6219400116  H,0,1.837215525,2.7056222843,-2.6769033348  H,0,2.7767508254,3.7798640959,-1.5960368466  H,0,2.6309622386,2.0372598885,-1.2264990513  C,0,4.6931685114,-1.1248250329,-0.2721520599  H,0,5.6458283885,-1.6057801081,0.0097606198  H,0,4.2399340064,-1.7073490804,-1.0885823048  H,0,4.921279822,-0.1119874205,-0.644244942  C,0,-2.3623625146,0.0464546569,2.6830623444  H,0,-1.3270866583,-0.2048188245,2.960359449  H,0,-2.9025155823,0.3273156302,3.6012816351  H,0,-2.8471967599,-0.8516981839,2.2698517936  C,0,-1.2297471452,-3.3578001967,-0.7847544088  H,0,-1.2309249307,-4.1813579266,-1.5185212896  H,0,-0.4778873007,-3.5841779701,-0.0154610662  H,0,-2.229186327,-3.3118464703,-0.3249170303 | **TSIC-assis (d1)**  C,0,0.9510563054,1.3440680495,0.1475437586  N,0,1.061176153,0.1769451577,1.0171527726  N,0,-0.2878833838,1.3717781714,-0.3364870676  S,0,2.2510468924,2.3854647251,-0.1517484927  C,0,-1.1024508314,0.2502659277,0.0077892888  O,0,0.7677120045,-1.412769975,-0.8773975191  O,0,-0.5023286696,-1.7162856398,1.3425333437  H,0,1.9282361458,-0.3634541923,0.7932981708  C,0,1.0414111054,0.4929948903,2.4634029013  H,0,1.9423276232,1.0617195694,2.7295918893  H,0,0.142092068,1.0777271011,2.7005514375  H,0,1.0137386658,-0.4610989286,3.0062292606  C,0,-0.2619164896,-0.7774906725,0.6078403293  C,0,-2.5124483486,0.2410511803,-0.1328089135  O,0,-3.2504220358,1.1716379412,-0.5014647977  O,0,-3.0593922945,-0.9859780231,0.1918612272  H,0,2.1426789513,-1.7801966928,-0.2775607188  O,0,3.0146813536,-1.6917195486,0.2505288278  C,0,-4.4813223889,-1.0552711125,0.1130025002  H,0,-4.8478003999,-0.8446277437,-0.905423568  H,0,-4.7453008883,-2.0851159886,0.3932411139  H,0,-4.9691981066,-0.3502232962,0.8073987348  C,0,-0.6854454385,2.3880477178,-1.3077869779  H,0,-0.2372538598,2.156278552,-2.2887995221  H,0,-1.7773989103,2.3827862766,-1.3731401383  H,0,-0.3157159004,3.3682093014,-0.97937368  C,0,0.0400596923,-2.4074522566,-1.5222784991  H,0,-0.3541056573,-3.1834074985,-0.8255528791  H,0,-0.8393533472,-2.0041196318,-2.07664436  H,0,0.6664626973,-2.9374067783,-2.2718361914  C,0,4.0448328003,-1.3675201364,-0.6664979134  H,0,4.9324325387,-1.0270416373,-0.1049374828  H,0,4.3498825117,-2.2458285425,-1.2721120481  H,0,3.757030442,-0.5589062663,-1.3659607868  **TSIC-assis (d2)**  C,0,-0.7976577797,-1.591910438,-0.1257929531  N,0,-0.892428844,-0.7172907973,1.0359991162  N,0,0.3791690041,-1.3720156155,-0.7065265108  S,0,-2.0442212138,-2.642295195,-0.58429102  C,0,1.1525624339,-0.3104478046,-0.1441219476  O,0,-0.9001454986,1.3385368973,-0.3749681871  O,0,0.5816555546,1.1656301581,1.7270029838  H,0,-1.8105568124,-0.21924361,1.0425979278  C,0,-0.6961723663,-1.4033613165,2.3321178259  H,0,-1.5224695856,-2.1049882038,2.5090323796  H,0,0.260367647,-1.9436099786,2.3236765499  H,0,-0.6757649177,-0.6308749009,3.1124737881  C,0,0.3229030414,0.4449563192,0.7843574646  C,0,2.5462621415,-0.1733590532,-0.3629669234  O,0,3.2929734846,-0.9410833307,-0.995496596  O,0,3.04948361,0.9818233135,0.2103136578  H,0,-2.2410974419,1.4087598681,0.411282552  O,0,-3.0424496311,1.1129564729,0.970744053  C,0,4.4729601636,1.1610323042,0.1435765308  H,0,4.8476332442,0.8087204235,-0.8292316526  H,0,4.6189733146,2.2506633528,0.2058214552  C,0,0.7297573854,-2.0398787576,-1.9575774215  H,0,0.177691207,-1.5738002327,-2.7913969066  H,0,1.8085437669,-1.935562407,-2.1053651215  H,0,0.4425848463,-3.0976493843,-1.8980056105  C,0,-0.3058832345,2.509433642,-0.8503402439  H,0,-0.3075359605,3.3237541897,-0.0868409706  H,0,0.7650021705,2.3243447484,-1.0921512226  C,0,-4.1550508274,0.9515317656,0.0987787239  H,0,-4.509106453,1.9421904003,-0.2559218131  H,0,-3.8715620664,0.3720138545,-0.8021526737  C,0,5.1950780055,0.4594555625,1.2838650031  H,0,5.0835072599,-0.6337730061,1.2071529136  H,0,6.2721822166,0.6978316217,1.2528663172  H,0,4.7991930456,0.7844351904,2.2604478872  C,0,-5.2811924508,0.2474109277,0.8357563796  H,0,-6.1740699665,0.1567191236,0.1945196644  H,0,-4.9754315853,-0.7671398616,1.1431876596  H,0,-5.5644796159,0.8094743534,1.7419735113  C,0,-1.0093063419,3.0177848514,-2.1091737177  H,0,-2.0666488611,3.25966881,-1.9021001693  H,0,-0.5231803713,3.9299447245,-2.4999989464  H,0,-0.9895767176,2.2480470181,-2.8999947364  **TSIC-assis (d3)**  C,0,0.890275549,1.2186480216,-0.0755277643  N,0,1.1647794767,0.1035209546,0.8268307862  N,0,-0.3516486224,1.0782108417,-0.5349828574  S,0,2.0565841974,2.3989603236,-0.4290763407  C,0,-1.0390545913,-0.093476782,-0.0984599217  O,0,0.9119973749,-1.6949954915,-0.8763870748  O,0,-0.2422003369,-1.8597174137,1.4009546857  H,0,2.046805236,-0.3680181854,0.5277466436  C,0,1.3286240451,0.4453586614,2.2740911358  H,0,2.2452843143,1.0478878264,2.3569443758  H,0,1.4999918306,-0.521870688,2.76845027  C,0,-0.0956426169,-0.9893111827,0.5612910919  C,0,-2.4370705038,-0.2592452157,-0.2405552004  O,0,-3.2581403547,0.5573816369,-0.6937124703  O,0,-2.864156157,-1.501676242,0.1922689374  H,0,2.3698704794,-1.8670996621,-0.3650547116  O,0,3.268993229,-1.6359889591,0.0574375488  C,0,-4.2687814405,-1.7242381429,0.096133669  H,0,-4.6245283198,-1.6716059394,-0.9466992623  H,0,-4.438043045,-2.7369866035,0.4892608654  C,0,-0.8964740775,2.0167071572,-1.5328252399  H,0,-0.054302525,2.310842446,-2.1754390635  H,0,-1.636490058,1.4626781009,-2.1183304394  C,0,0.2616890003,-2.8203424258,-1.3767679566  H,0,-0.0740656126,-3.5179335539,-0.5757978109  H,0,-0.641553091,-2.5642371688,-1.9770960002  H,0,0.9326966393,-3.3991050346,-2.0466768616  C,0,4.1766460734,-1.3456108432,-0.9914744443  H,0,5.0776496847,-0.8709173475,-0.5654764605  H,0,4.5027273414,-2.2631770278,-1.5229797598  H,0,3.7542056903,-0.6524117342,-1.7448855607  C,0,-1.5408076158,3.2453984223,-0.8992337919  H,0,-0.8156478268,3.8156457655,-0.2982818221  H,0,-1.9185794609,3.9088211474,-1.6951807489  H,0,-2.3902317381,2.946923847,-0.2680844826  H,0,-4.8459153904,-0.9978400353,0.6927194231  C,0,0.1397166552,1.1638731716,2.8910867173  H,0,-0.0787170602,2.1156209133,2.3820077358  H,0,-0.7634694581,0.5367842351,2.8770213139  H,0,0.3762900861,1.3967982064,3.9416968466  **TSIC-assis (d4)**  C,0,0.857055528,1.4320250728,-0.079685745  N,0,1.0352868844,0.3709277097,0.9042985686  N,0,-0.3386484417,1.2753436918,-0.6444403962  S,0,2.0589485108,2.5899522022,-0.3871222202  C,0,-1.0737510422,0.1258995445,-0.2221807442  O,0,0.9405742726,-1.4858561458,-0.7299430647  O,0,-0.4375259675,-1.5679558462,1.4277614876  H,0,1.9379662707,-0.1182150162,0.7240395282  C,0,1.0420799908,0.7877093053,2.3396820996  H,0,1.9651291547,1.3636802892,2.503894931  H,0,1.1145551693,-0.1566737295,2.8991055966  C,0,-0.2051539506,-0.7473435641,0.5584570997  C,0,-2.470354727,0.0066361283,-0.4178858043  O,0,-3.2339714904,0.8460614218,-0.9271580501  O,0,-2.9565323645,-1.2158423619,0.0171543607  H,0,2.3762321162,-1.6582099399,-0.0983392844  O,0,3.2178599189,-1.4056359633,0.4089350882  C,0,-4.3794926382,-1.3962427517,-0.0475582903  H,0,-4.7734149132,-0.9250515054,-0.9606048734  H,0,-4.5192782126,-2.4860188404,-0.1218132947  C,0,-0.777272033,2.1577583668,-1.7411434615  H,0,0.1186569761,2.3863853324,-2.3364580834  H,0,-1.4858650761,1.5822185606,-2.3446698671  C,0,0.2998141488,-2.4677498408,-1.4928872747  H,0,-0.7758772648,-2.210906337,-1.6175330805  H,0,0.7250765289,-2.4780439128,-2.5222996032  C,0,4.2350171636,-1.1076132478,-0.5414242531  H,0,4.5734539593,-2.0379773517,-1.0433088147  H,0,3.8505404147,-0.4373704052,-1.335718661  C,0,-1.4283628113,3.4447033182,-1.24555738  H,0,-0.7289396984,4.0392944564,-0.6376672719  H,0,-1.729687503,4.0563482599,-2.1125199946  H,0,-2.3269883984,3.2132680203,-0.6561302544  C,0,-0.1819842709,1.5787676593,2.7735030726  H,0,-0.2937282045,2.5121616342,2.200002741  H,0,-1.1037557215,0.9871316487,2.6741232032  H,0,-0.0658037071,1.8527504432,3.8342991399  C,0,-5.083792542,-0.8503850773,1.1857714811  H,0,-4.9765337356,0.244219519,1.2461222023  H,0,-6.1606743156,-1.0882892869,1.1450585245  H,0,-4.6684284611,-1.2947240555,2.1056129759  C,0,0.4029452461,-3.8777934257,-0.9030751125  H,0,-0.0606136023,-3.9098974933,0.0955845287  H,0,-0.1026402529,-4.6195527177,-1.5484554973  H,0,1.4586496867,-4.1869943545,-0.7991179965  C,0,5.4122908709,-0.4566385138,0.1634263164  H,0,6.2359365779,-0.265076229,-0.5446423926  H,0,5.1175144076,0.5056815122,0.6149146024  H,0,5.7940245492,-1.1097021835,0.9665632182 |
| --- | --- |

**References**

**[1]** M.J. Frisch, G.W. Trucks, H.B. Schlegel, G.E. Scuseria, M.A. Robb, et al., Gaussian 09, Revision D.01, Gaussian. Inc, Wallingford CT, **2013**.
